# Supplementary material for: Rational construction of K0.5V2O5 nanobelts/CNTs flexible cathode for multi-functional potassium-ion batteries
Source: Royal Society of Chemistry journal article supplement (doi:10.1039/d1nr00993a), 2021-01-01
Supplement: d1nr00993a1.pdf [file d1nr00993a1.pdf]

# Rational construction of $K_{0.5}V_2O_5$ nanobelts/CNTs flexible cathode for multi-functional potassium ion batteries

Xin Li<sup>1</sup>, Chenfei Zhuang<sup>1</sup>, Junmin Xu<sup>1\*</sup>, Liang Li<sup>2</sup>, Tingting Xu<sup>1</sup>, Shuge Dai<sup>1</sup>, Xinchang Wang<sup>1</sup>, Xinjian Li<sup>1</sup>, Ye Wang<sup>1</sup>

1. Key Laboratory of Material Physics, Ministry of Education, School of Physics and Microelectronics, Zhengzhou University, Zhengzhou 450001, China
2. Institutes of Physical Science and Information Technology, Anhui University, Hefei 230601, China

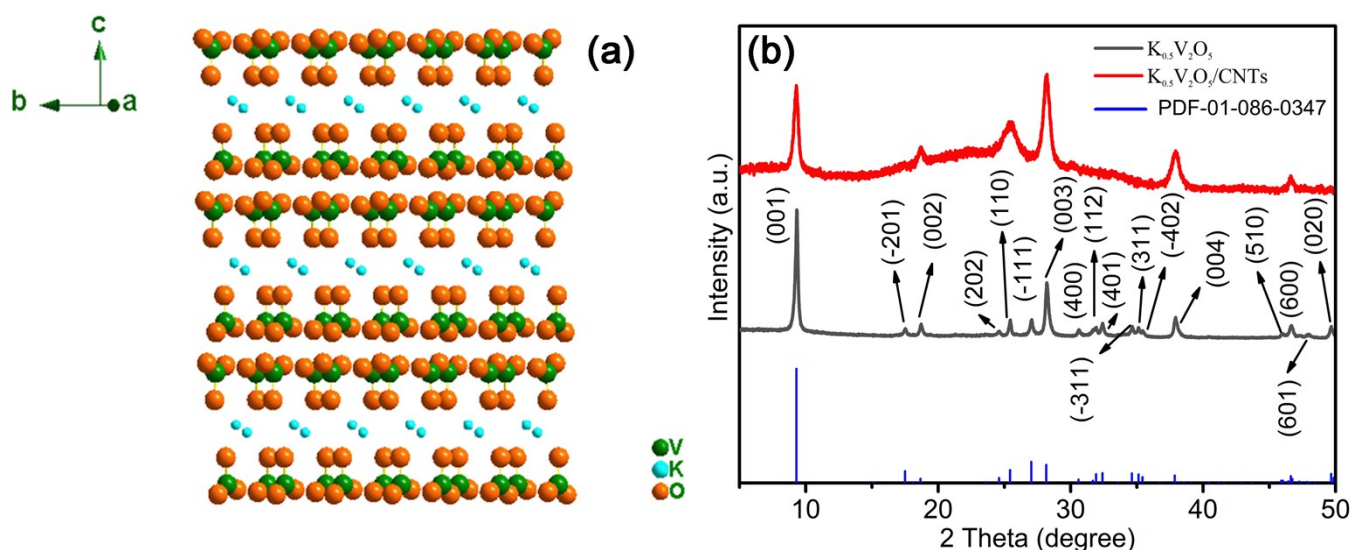

**Figure S1.** (a) The crystal structure of  $K_{0.5}V_2O_5$ . (b) XRD patterns of  $K_{0.5}V_2O_5$  and  $K_{0.5}V_2O_5/CNTs$  film.

\* Corresponding author.

Email address: junminxu@zzu.edu.cn

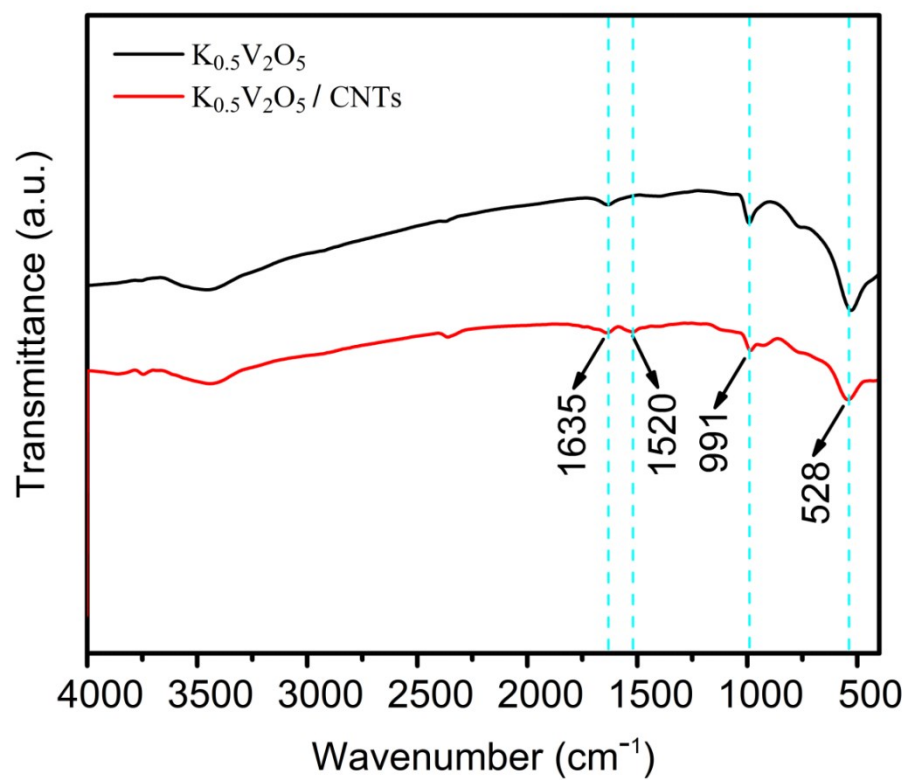

**Figure S2.** FTIR spectra of K<sub>0.5</sub>V<sub>2</sub>O<sub>5</sub> and K<sub>0.5</sub>V<sub>2</sub>O<sub>5</sub>/CNTs.

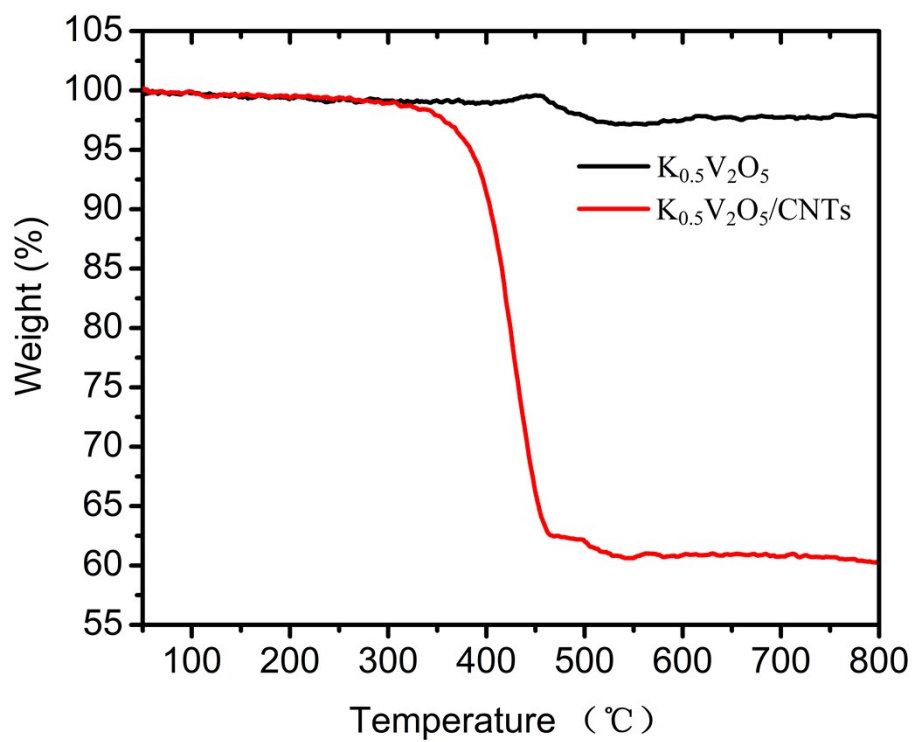

**Figure S3.** Weight loss curves of K<sub>0.5</sub>V<sub>2</sub>O<sub>5</sub> and K<sub>0.5</sub>V<sub>2</sub>O<sub>5</sub>/CNTs determined via TGA

in air.

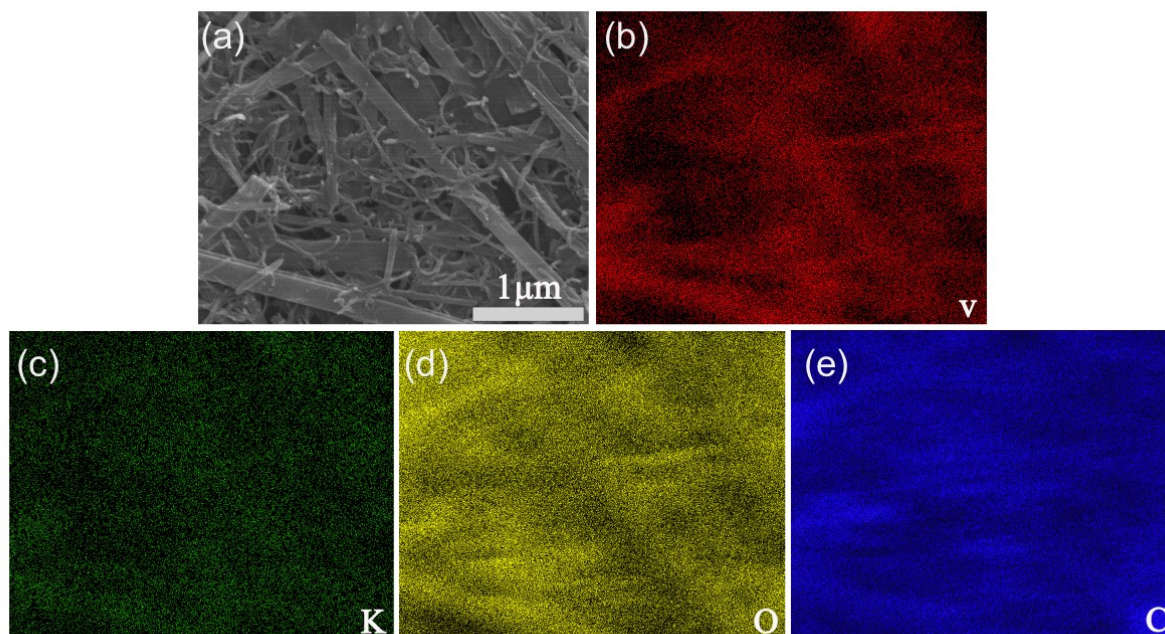

**Figure S4.** (a-e) SEM and EDS mapping images of  $K_{0.5}V_2O_5/CNTs$  film.

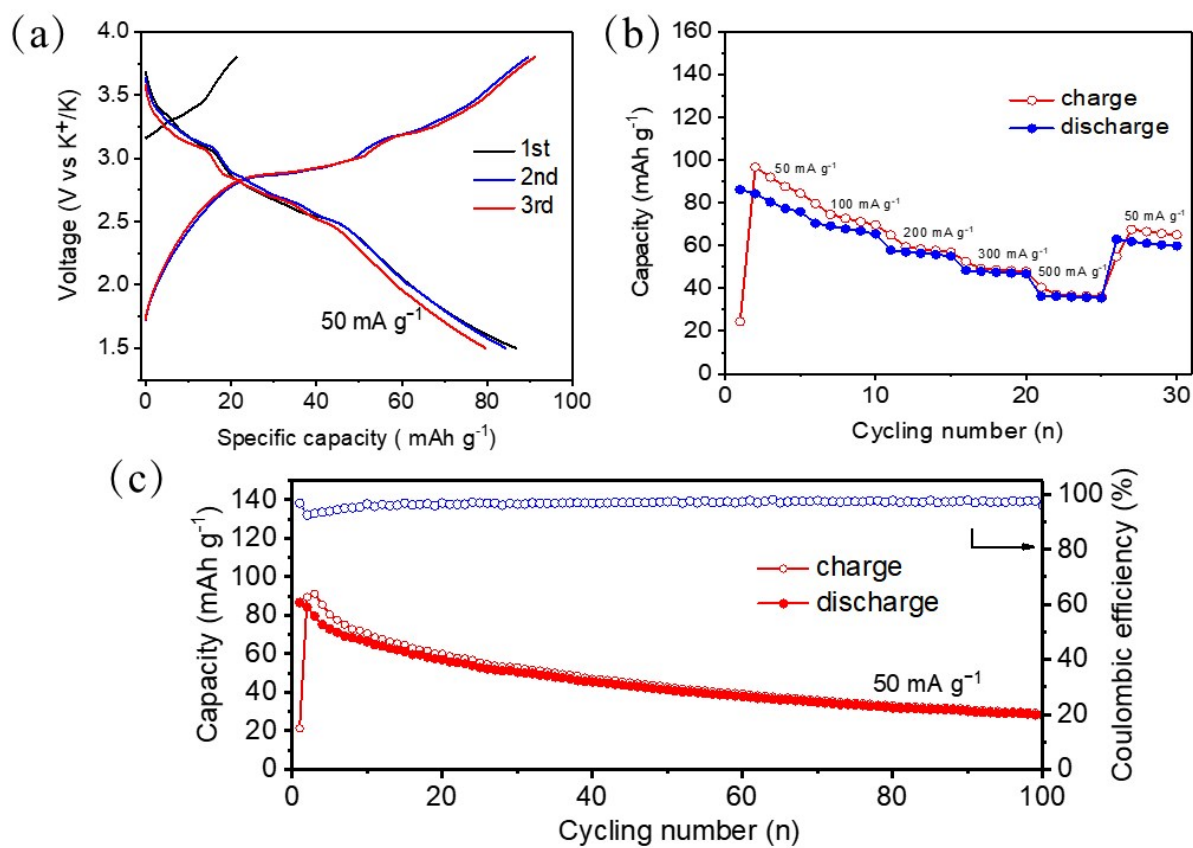

**Figure S5.** (a) Initial three charge/discharge curves of  $\text{K}_{0.5}\text{V}_2\text{O}_5$  electrode at a current density of  $50 \text{ mA g}^{-1}$ . The electrochemical performance of  $\text{K}_{0.5}\text{V}_2\text{O}_5/\text{CNTs}$  electrode: (b) rate capability; and (c) cycling performance.

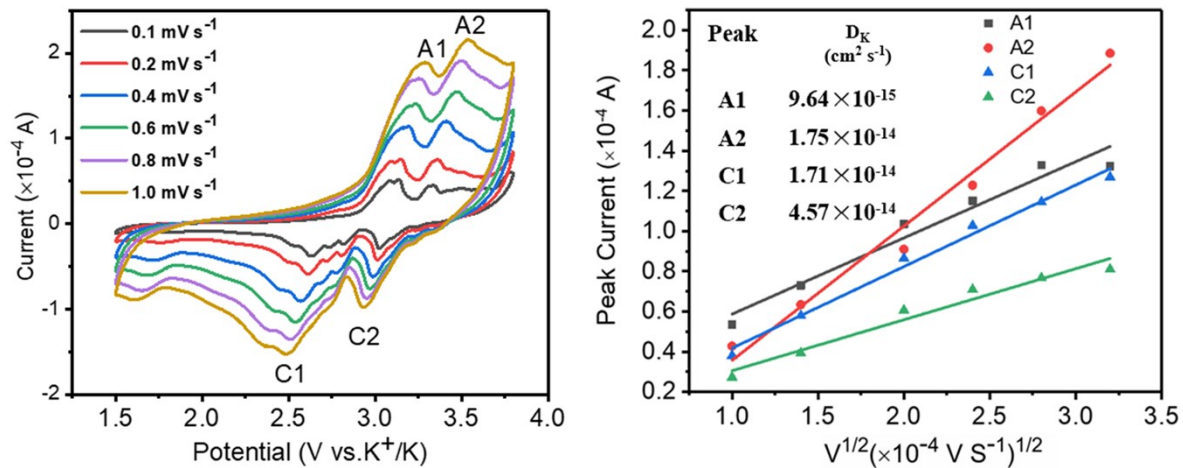

**Figure S6.** (a) CV curves of  $\text{K}_{0.5}\text{V}_2\text{O}_5$  electrode at various scanning rates of 0.1, 0.2, 0.4, 0.6, 0.8 and 1.0  $\text{mV s}^{-1}$ ; and (b) the corresponding linear fitting curve between the peak current ( $i_p$ ) and the square root of the scan rate ( $v^{1/2}$ ).
